# Supplementary material for: Reexamining Povarov Reaction’s Scope and Limitation in the Generation of HCV-NS4A Peptidomimetics
Source: Hindawi journal article supplement (doi:10.1155/2022/8181543), 2022-02-10

Supporting Information

Reexamining Povarov Reaction’s Scope and Limitation in the Generation of HCV-NS4A Peptidomimetics

Maan T. Khayat1, Abdelsattar M. Omar1,2,3, Mahmoud A. Elfaky2,4, Yosra A. Muhammad1,2, Elaf A. Flemban1, Khalid M. El-Say5 and Moustafa E. El-Araby1,2*

1Department of Pharmaceutical Chemistry, Faculty of Pharmacy, King Abdulaziz University, Jeddah 21589, Saudi Arabia.

2Center for Artificial Intelligence in Precision Medicines, King Abdulaziz University, Jeddah 21589, Saudi Arabia.

3Faculty of Pharmacy, Department of Pharmaceutical Chemistry, Al-Azhar University, Nasr City, Cairo, Egypt.

4Department of Natural Products and Alternative Medicine, Faculty of Pharmacy, King Abdulaziz University, Jeddah 21589, Saudi Arabia.

5Department of Pharmaceutics, Faculty of Pharmacy, King Abdulaziz University, Jeddah 21589, Saudi Arabia.

*Corresponding author, E-mail: [madaoud@kau.edu.sa](mailto:madaoud@kau.edu.sa)

**4c, 1H NMR**


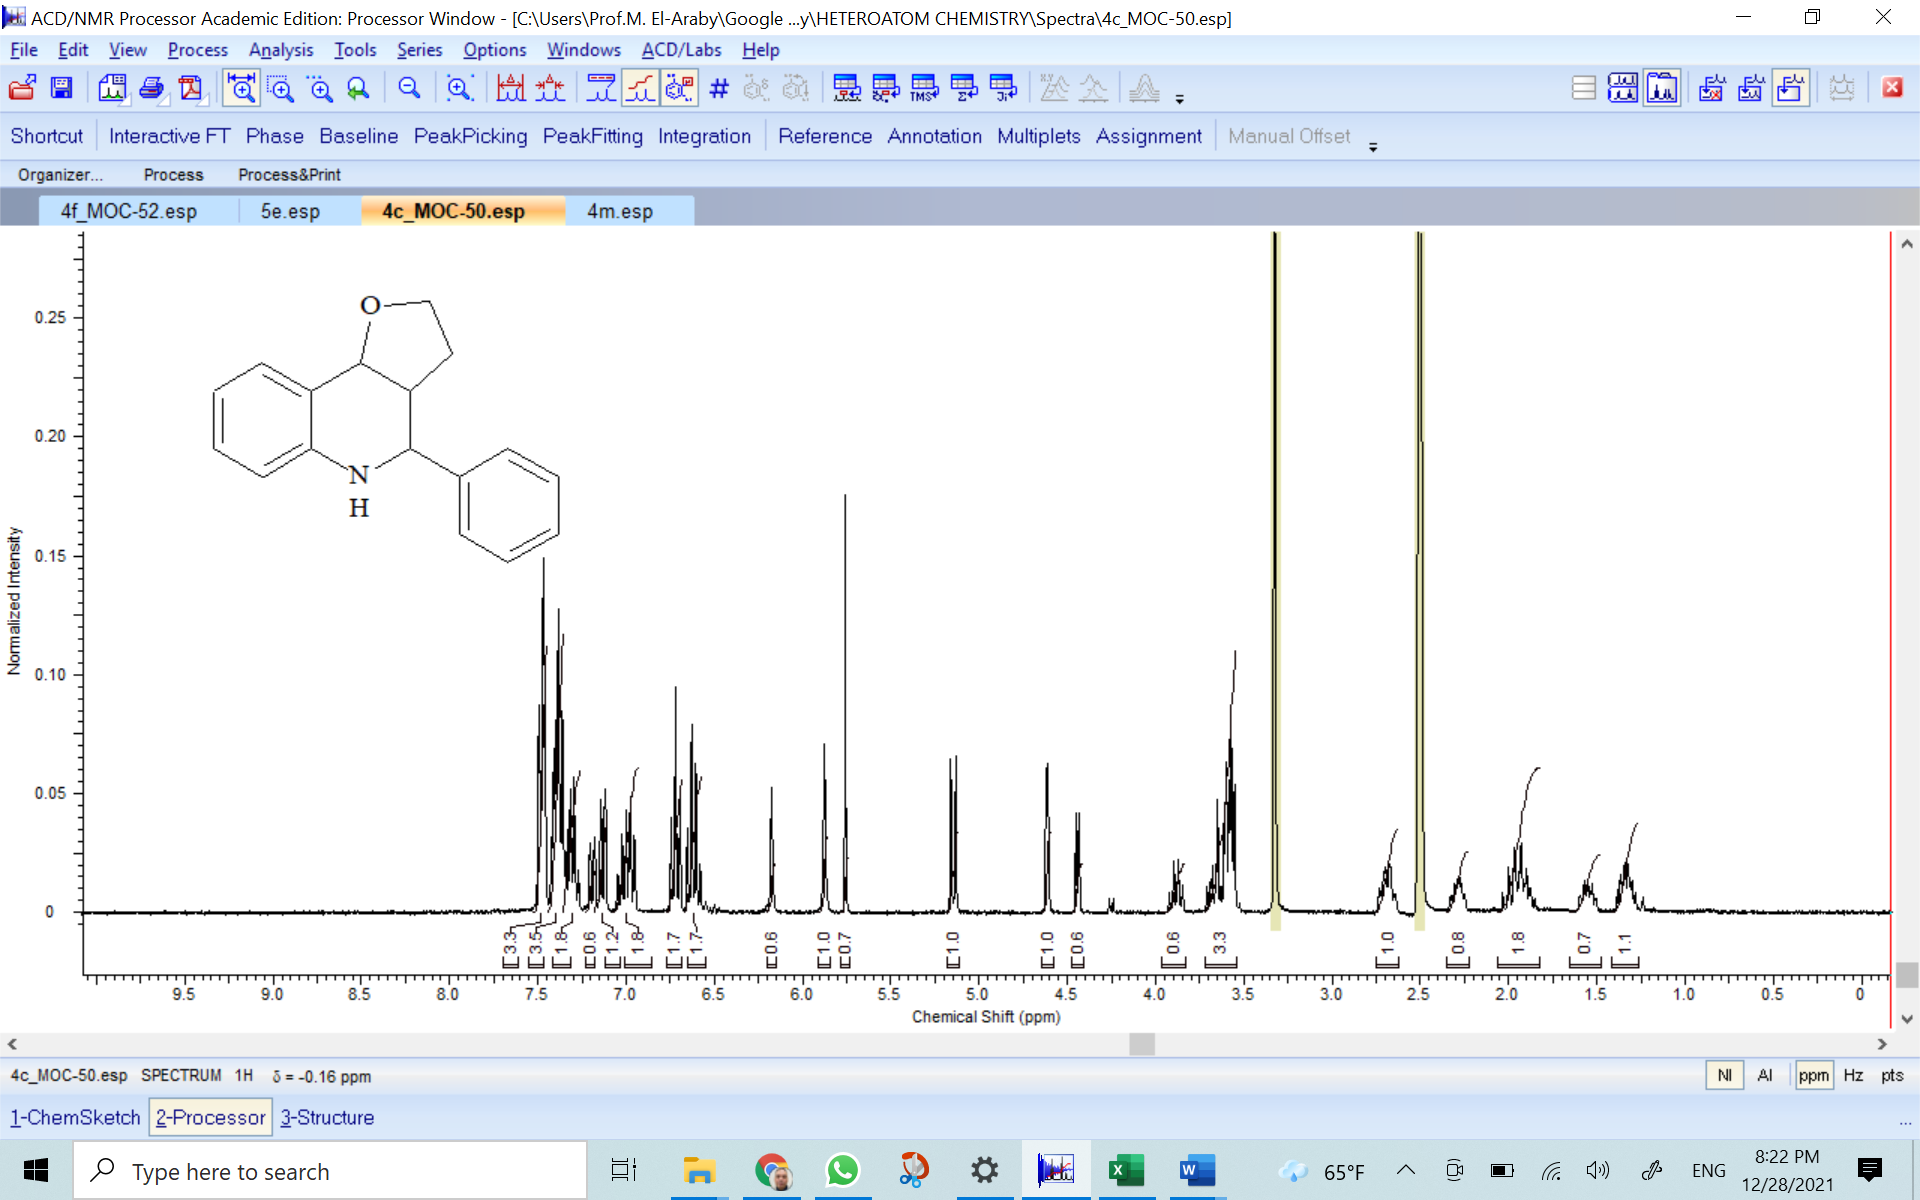


**4c (Mass = 251.1)**

**
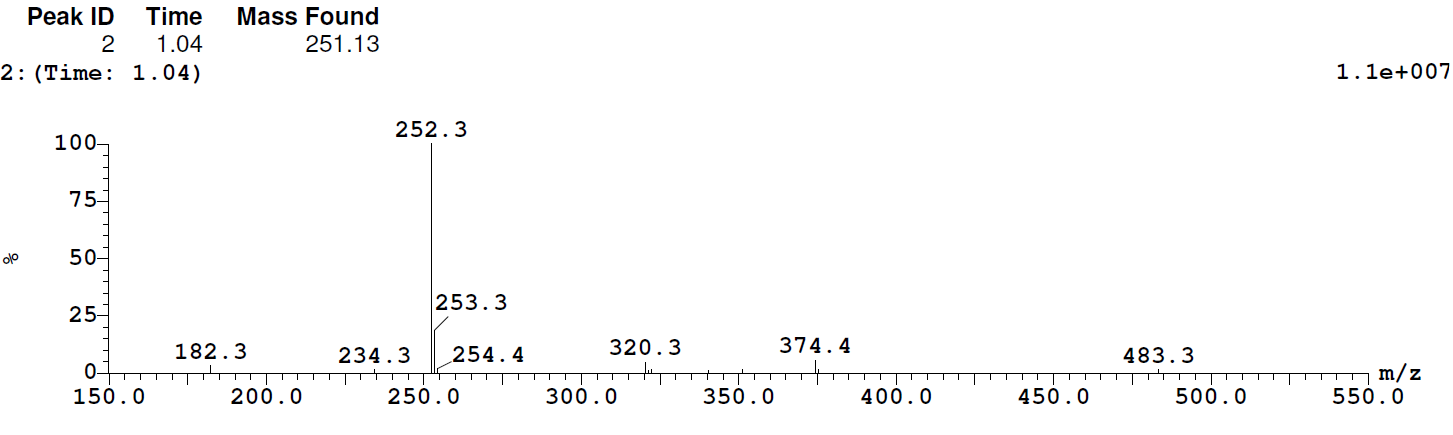
**

**
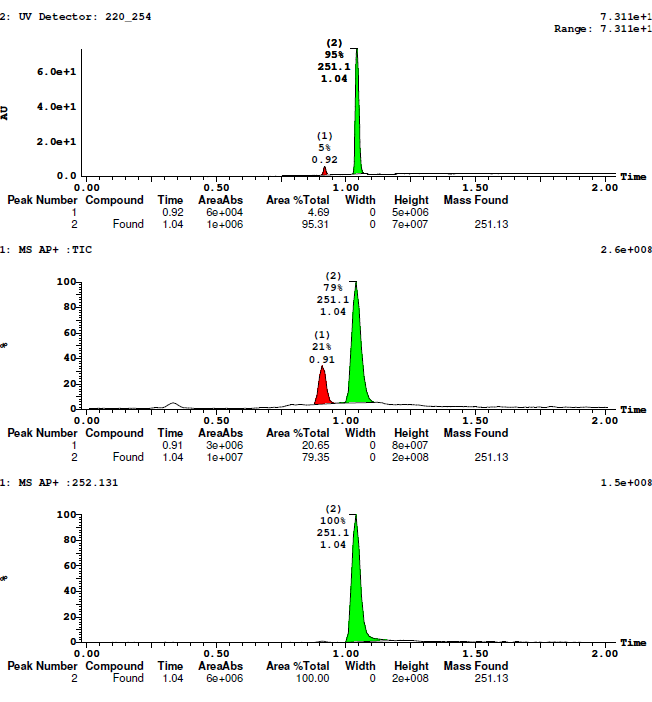
**

**4f, 1H NMR**


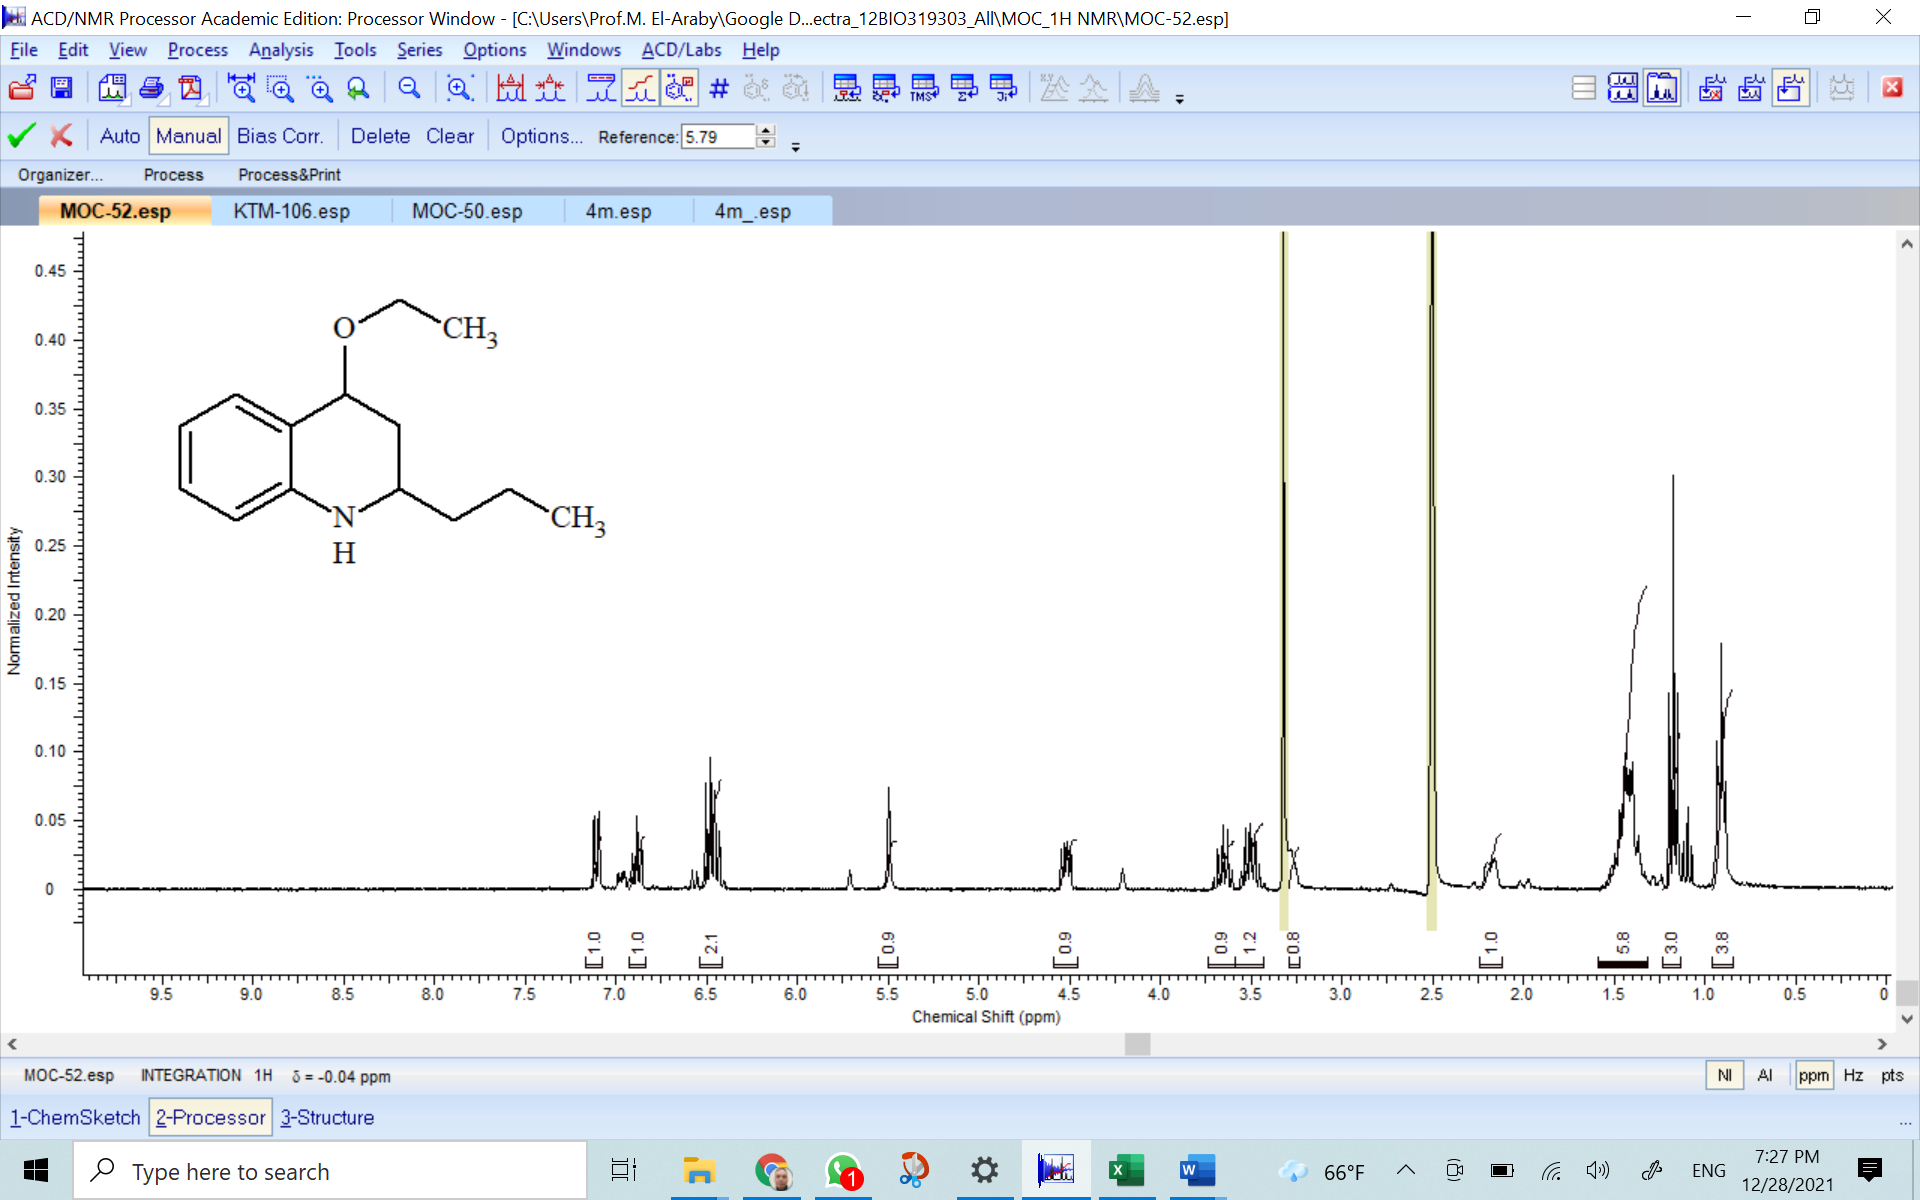


**4f, Mass = 219.2**


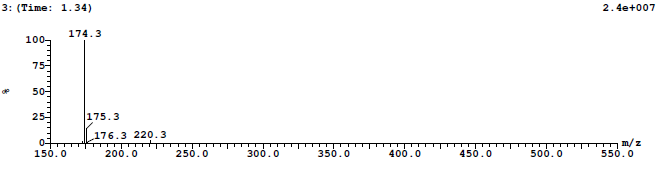


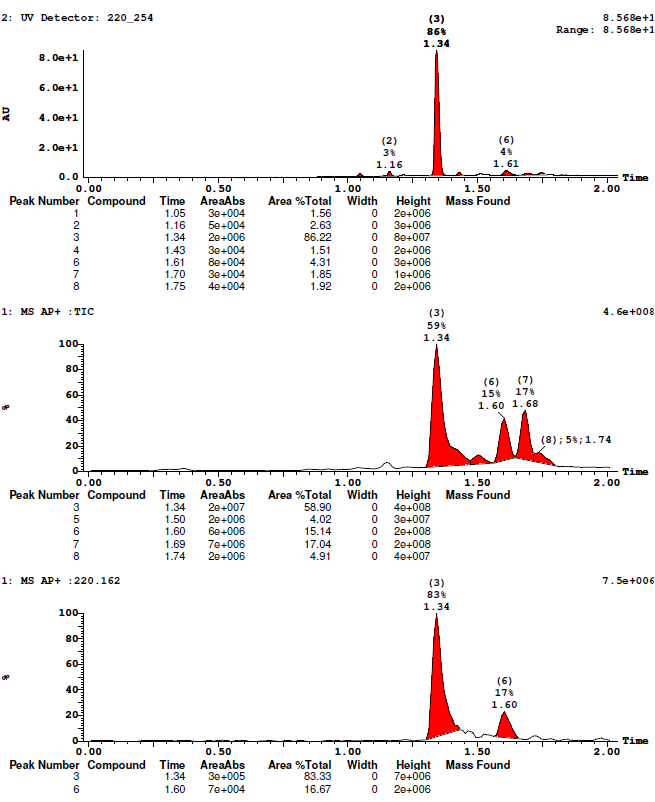


**4m, 1H NMR**


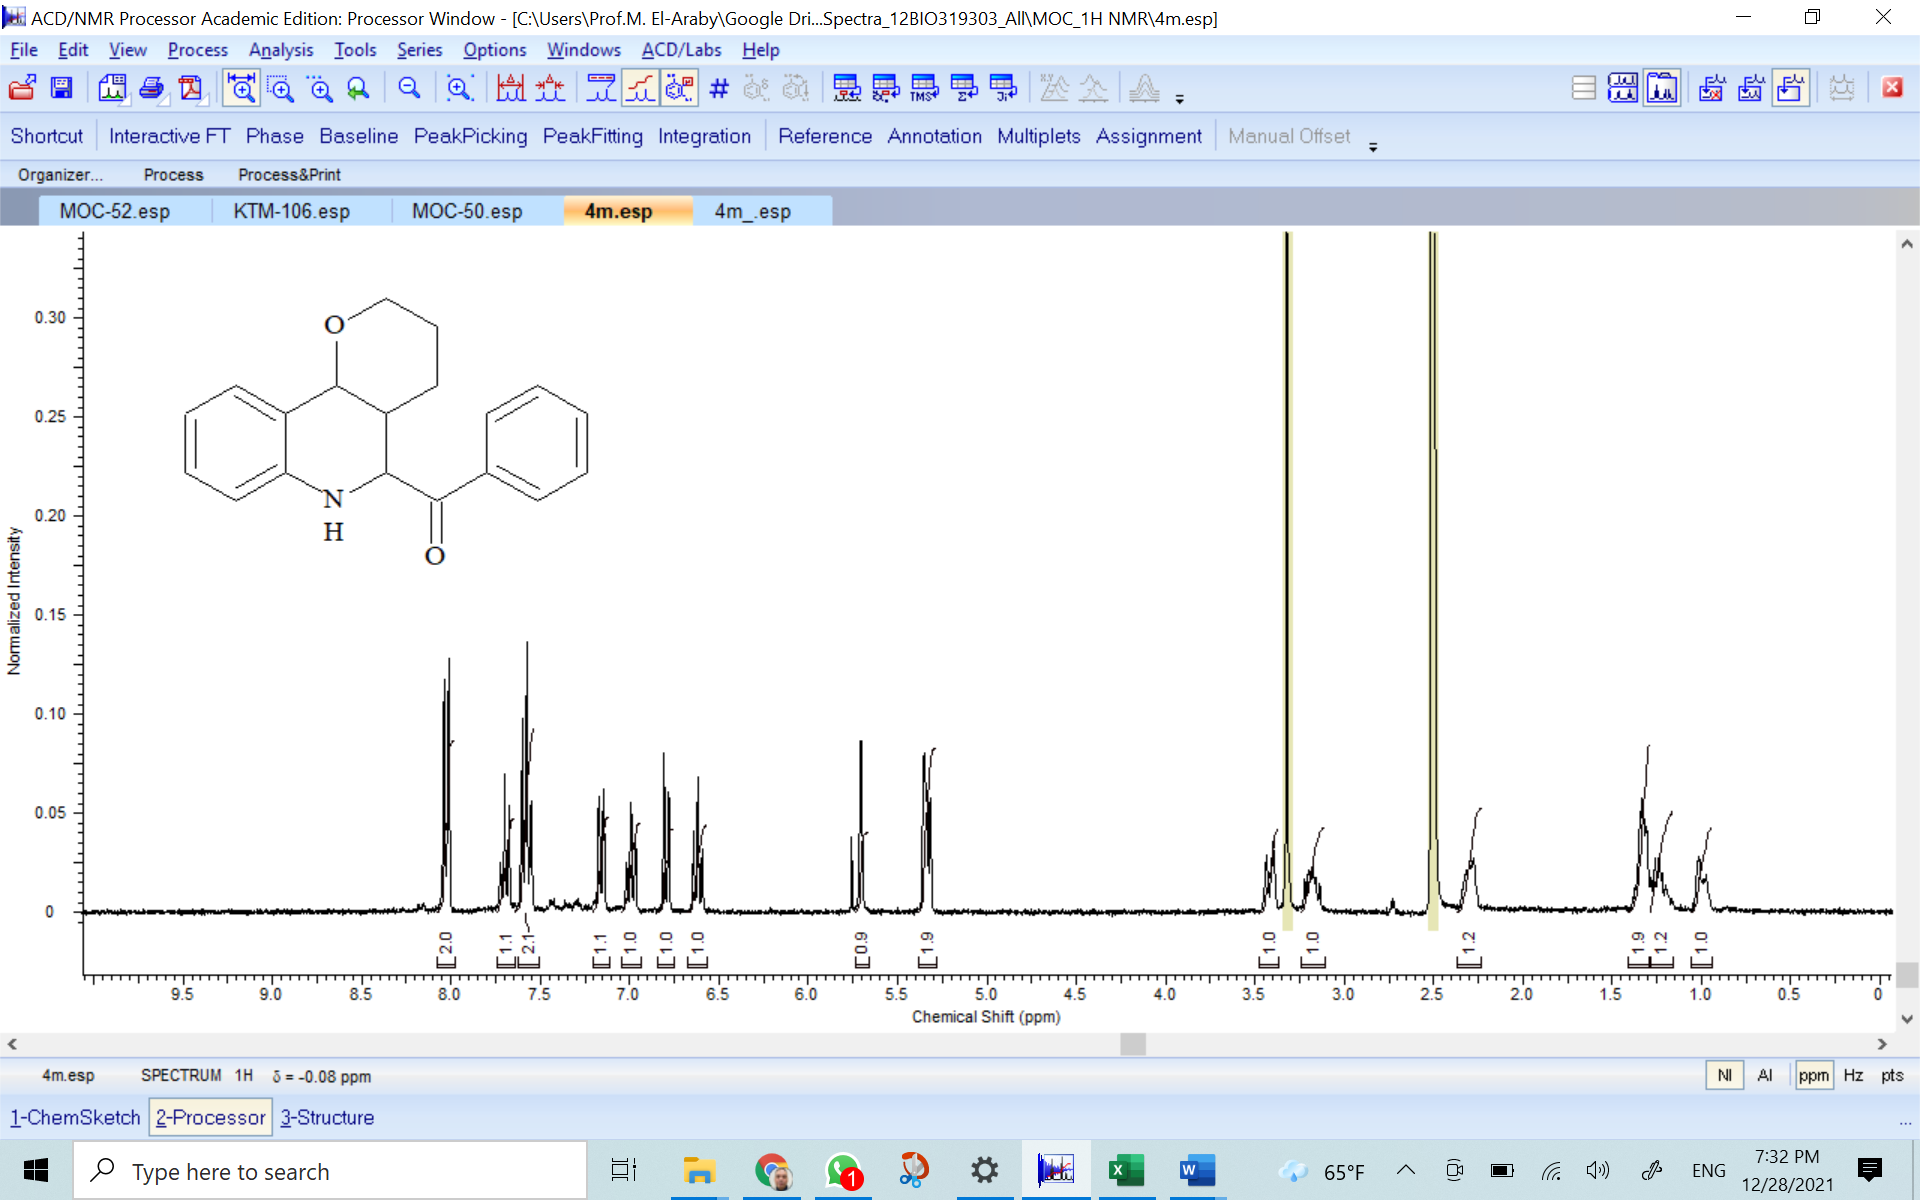


**4m, Mass = 293.1**


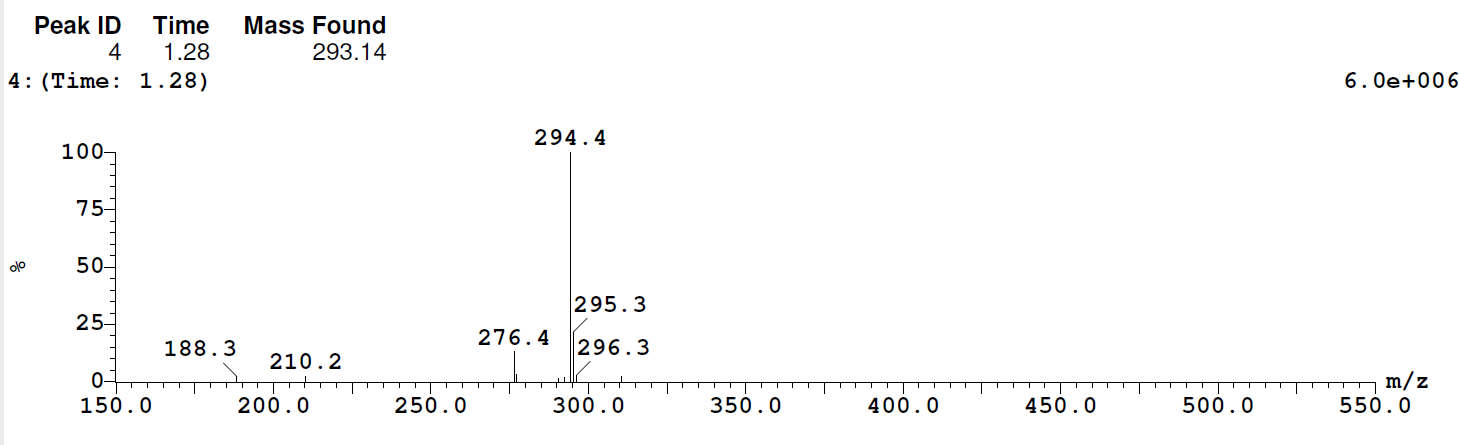


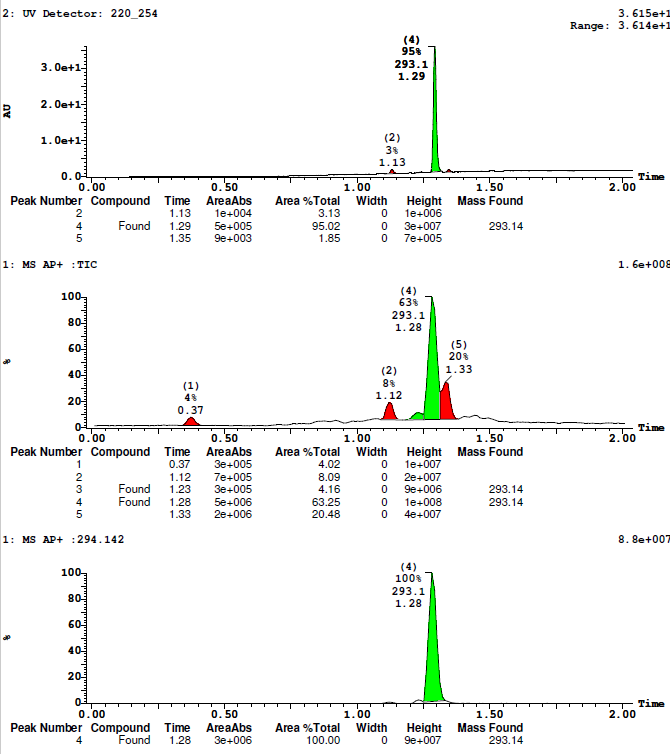


**5f, 1H NMR**


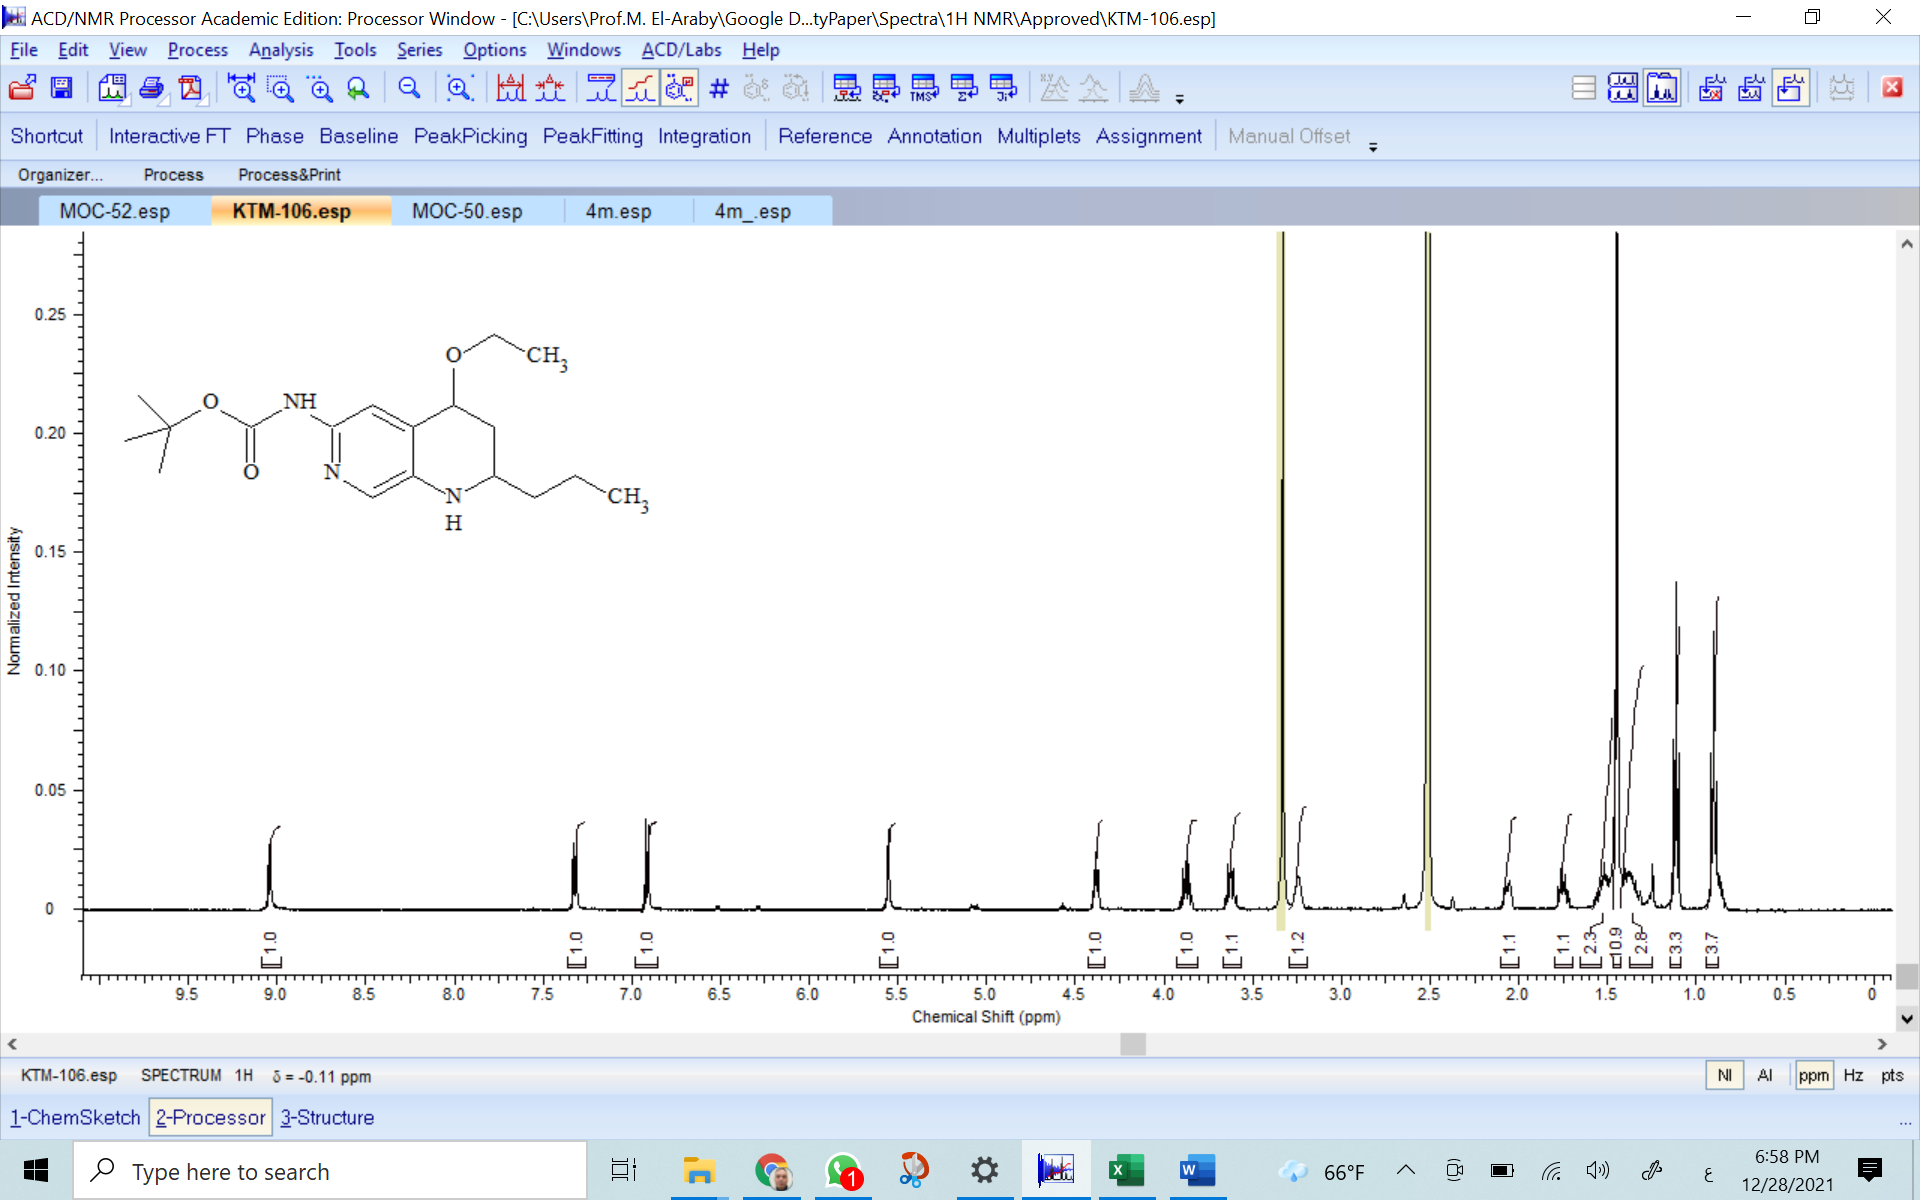


**5f, Mass = 335.2**

**
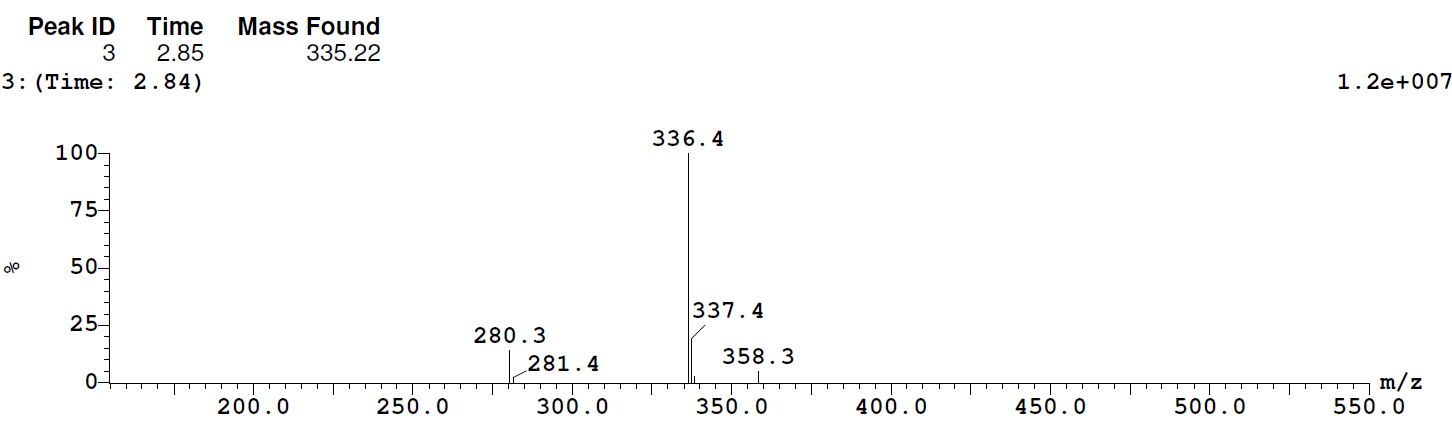
**


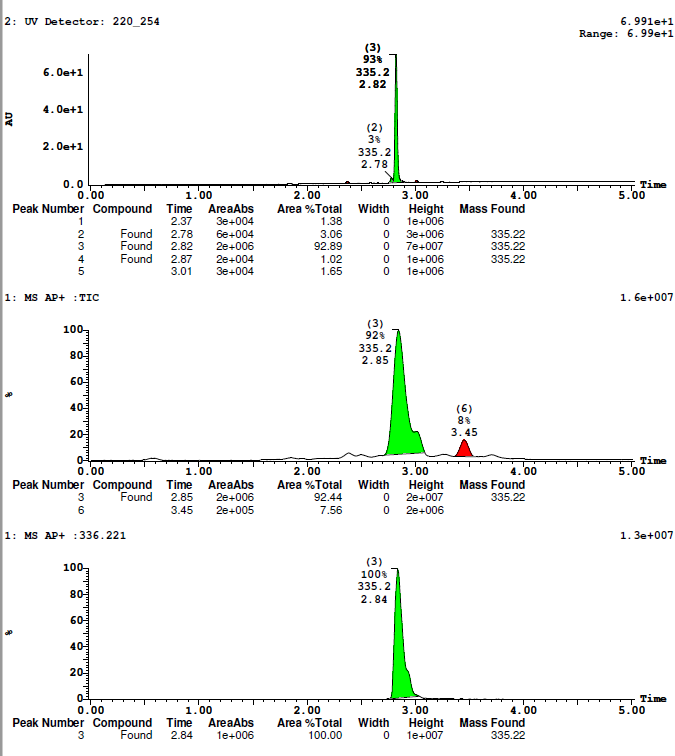

Supplement: f1 [file 8181543.f1.docx]
